# Supplementary material
Source: PubMed Central journal article supplement (PMC6643403)
Supplement: ao6b00436_si_001.pdf [file ao6b00436_si_001.pdf]

# Supporting Information

## Controlling T cell activation with synthetic Dendritic Cells using the multivalency effect

*Roel Hammink,<sup>‡a</sup> Subhra Mandal,<sup>‡b</sup> Loek J. Eggermont,<sup>b</sup> Marco Nootboom,<sup>c</sup> Peter H. G. M. Willems,<sup>c</sup> Jurjen Tel,<sup>b</sup> Alan E. Rowan,<sup>\*a</sup> Carl G. Figdor,<sup>\*b</sup> Kerstin G. Blank<sup>\*a</sup>*

<sup>a</sup>Department of Molecular Materials, Institute for Molecules and Materials, Radboud University, Heyendaalseweg 135, 6525 AJ Nijmegen, The Netherlands

<sup>b</sup>Department of Tumor Immunology, Radboud Institute for Molecular Life Sciences, Radboud University, Geert Grooteplein 26, 6525 GA Nijmegen, The Netherlands

<sup>c</sup>Department of Biochemistry, Radboud Institute for Molecular Life Sciences, Radboud University, Geert Grooteplein 26, 6525 GA Nijmegen, The Netherlands

<sup>‡</sup> Both authors contributed equally.

Email: a.rowan@science.ru.nl; C.Figdor@radboudumc.nl; kerstin.blank@mpikg.mpg.de

## TABLE OF CONTENTS

|                                                                                                                  |    |
|------------------------------------------------------------------------------------------------------------------|----|
| <b>Table S1.</b> Characteristics of the polymers .....                                                           | 3  |
| <b>Figure S1.</b> Representative AFM images of the polymer-SAv conjugates.....                                   | 3  |
| <b>Figure S2.</b> Length distribution of the different polymer-SAv conjugates .....                              | 4  |
| <b>Figure S3.</b> Average distance between SAv molecules .....                                                   | 4  |
| <b>Table S2.</b> Characteristics of the SAv-functionalized polymers .....                                        | 5  |
| <b>Table S3.</b> Treatment conditions for the single-cell Ca <sup>2+</sup> -signaling experiments .....          | 5  |
| <b>Table S4.</b> Number of cells analyzed for the single-cell Ca <sup>2+</sup> -signaling experiments.....       | 6  |
| <b>Figure S4.</b> Representative time traces of a single-cell Ca <sup>2+</sup> -signaling experiment.....        | 7  |
| <b>Figure S5.</b> IFN $\gamma$ secretion of PBLs normalized to polymer concentration .....                       | 7  |
| <b>Figure S6.</b> Timeline of the post-stimulation single-cell Ca <sup>2+</sup> -signaling experiments .....     | 8  |
| <b>Figure S7.</b> Results of the post-stimulation Ca <sup>2+</sup> -signaling experiments .....                  | 9  |
| <b>Table S5.</b> Number of cells analyzed for the post-stimulation Ca <sup>2+</sup> -signaling experiments ..... | 10 |
| <b>Figure S8.</b> Post-stimulation analysis of CD69 expression.....                                              | 10 |
| <b>Figure S9.</b> FACS analysis of sDC-treated ( <b>P3c</b> ) and untreated PBLs.....                            | 11 |

**Table S1.** Characteristics of the polymers.

| Polymer | Catalyst ratio | N <sub>3</sub> ratio | M <sub>v</sub> (kg/mol) <sup>a</sup> |
|---------|----------------|----------------------|--------------------------------------|
| P1'     | 1:200          | 1:100                | 200                                  |
| P2'     | 1:10,000       | 1:100                | 628                                  |
| P3'     | 1:10,000       | 1:70                 | 577                                  |

<sup>a</sup>Determined from viscosity measurements.

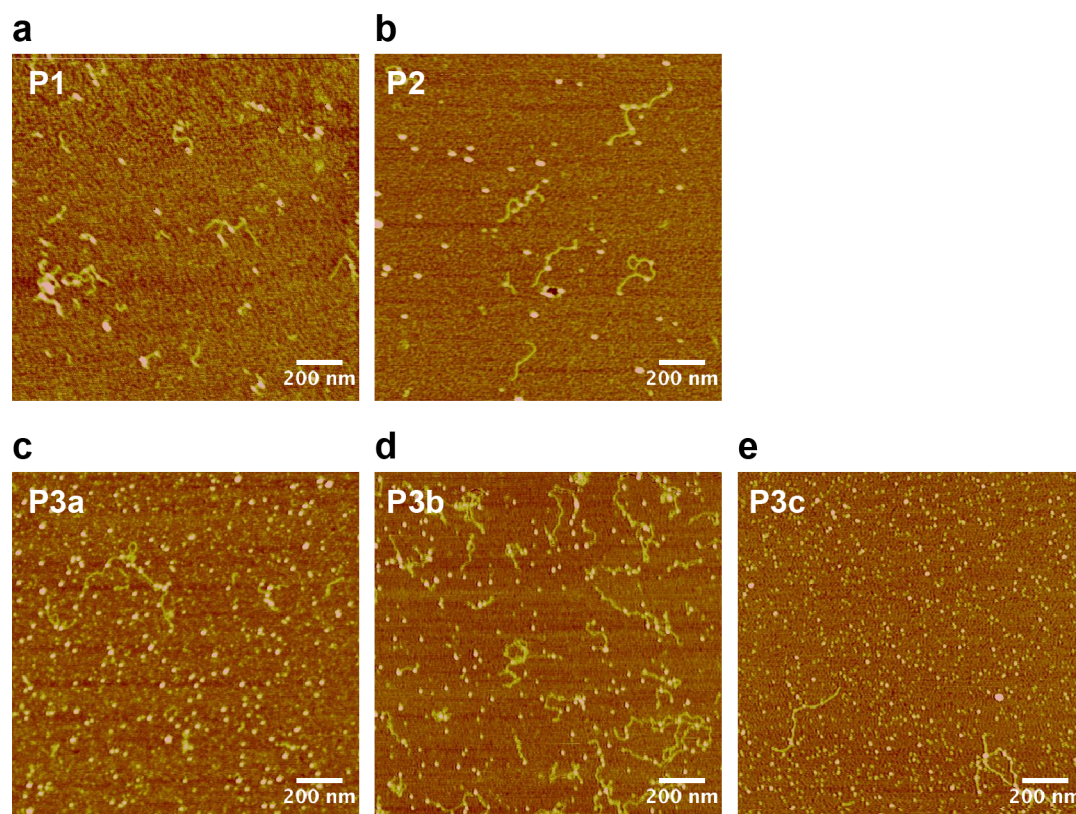

**Figure S1.** Representative AFM images of the polymer-SAV conjugates (**P1-P3c**) drop-casted on polylysine treated mica. Scale bar: 200 nm for (a)-(e).

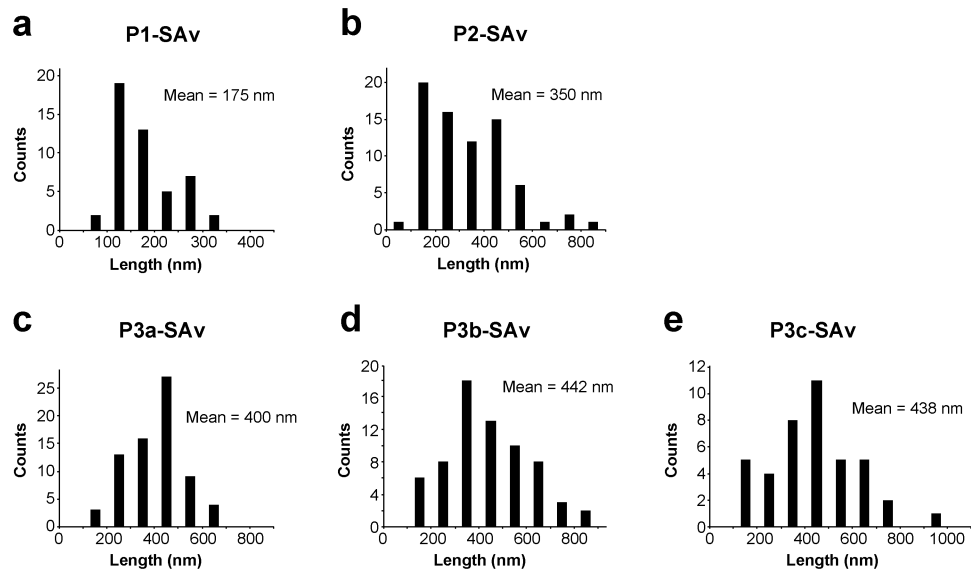

**Figure S2.** Length distribution of the different polymer-SAv conjugates as determined from AFM images. Each histogram contains at least 41 polymers: (a) **P1-SAv**,  $n = 48$ ; (b) **P2-SAv**,  $n = 74$ ; (c) **P3a-SAv**,  $n = 72$ ; (d) **P3b-SAv**,  $n = 68$ ; (e) **P3c-SAv**,  $n = 41$ .

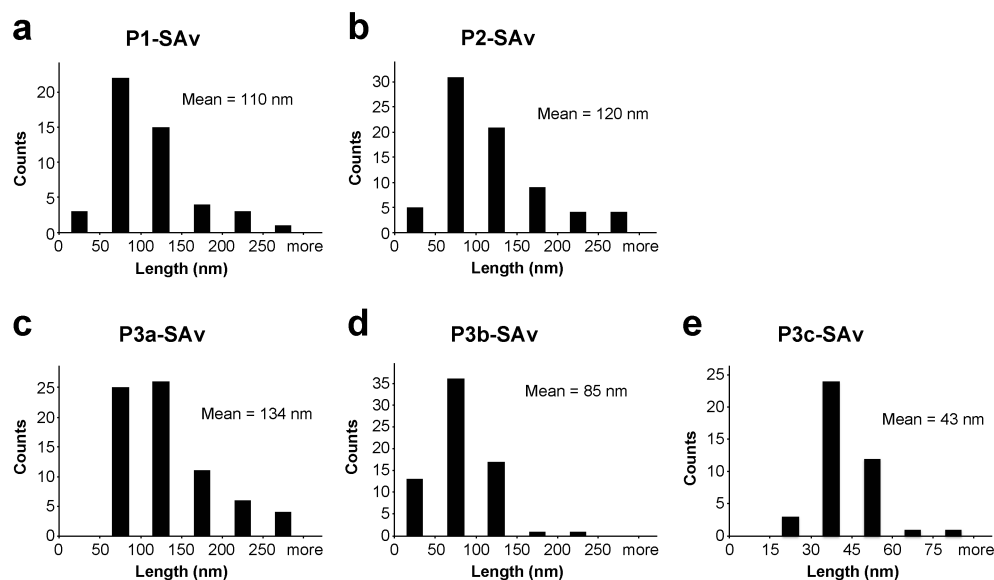

**Figure S3.** Average distance between SAv molecules determined from the AFM images. Each histogram contains at least 41 polymers: (a) **P1-SAv**,  $n = 48$ ; (b) **P2-SAv**,  $n = 74$ ; (c) **P3a-SAv**,  $n = 72$ ; (d) **P3b-SAv**,  $n = 68$ ; (e) **P3c-SAv**,  $n = 41$ .

**Table S2.** Characteristics of the polymer-SAv conjugates.

| Polymer    | SAv equivalents | Mean length (nm) <sup>a</sup> | Mean SAv distance (nm) <sup>a</sup> |
|------------|-----------------|-------------------------------|-------------------------------------|
| <b>P1</b>  | 1               | 175                           | 110                                 |
| <b>P2</b>  | 1               | 350                           | 120                                 |
| <b>P3a</b> | 0.5             | 400                           | 134                                 |
| <b>P3b</b> | 1               | 442                           | 85                                  |
| <b>P3c</b> | 5               | 438                           | 43                                  |

<sup>a</sup>Determined with AFM imaging.

**Table S3.** Treatment conditions for the single-cell Ca<sup>2+</sup>-signaling experiments.

| Experiment              | Stimulant                                                                                   | Imaging time                                                        | $\alpha$ CD3 concentration <sup>a</sup>       |
|-------------------------|---------------------------------------------------------------------------------------------|---------------------------------------------------------------------|-----------------------------------------------|
| 1. sDC length           | i. <b>P1</b><br>ii. <b>P2</b><br>iii. free $\alpha$ CD3<br>iv. untreated                    | 5 min baseline Ca <sup>2+</sup><br>1 h treatment<br>5 min ionomycin | 0.005, 0.5, 5, 25 ng/ml                       |
| 2. $\alpha$ CD3 density | i. <b>P3a</b><br>ii. <b>P3b</b><br>iii. <b>P3c</b><br>iv. free $\alpha$ CD3<br>v. untreated | 5 min baseline Ca <sup>2+</sup><br>1 h treatment<br>5 min ionomycin | 0.005, 0.5, 5, 25 ng/ml                       |
| 3. dose-response curves | i. <b>P3c</b><br>ii. free $\alpha$ CD3<br>iii. untreated                                    | 5 min baseline Ca <sup>2+</sup><br>1 h treatment<br>5 min ionomycin | 0.001, 0.01, 0.1, 5, 10, 25,<br>50, 100 ng/ml |

<sup>a</sup>The concentration always refers to the amount of  $\alpha$ CD3 bound to the  $\alpha$ CD3-sDCs or present in freely soluble form (free  $\alpha$ CD3).

**Table S4.** Number of cells analyzed for the single-cell Ca<sup>2+</sup>-signaling experiments.

| Experiment              | Stimulant       | c(αCD3)     | Number of cells analyzed |         |         |
|-------------------------|-----------------|-------------|--------------------------|---------|---------|
|                         |                 |             | Donor 1                  | Donor 2 | Donor 3 |
| 1. sDC length           | i. <b>P1</b>    | 0.005 ng/ml | 12                       | 7       | 5       |
|                         |                 | 0.5 ng/ml   | 12                       | 5       | 6       |
|                         |                 | 5 ng/ml     | 11                       | 5       | 6       |
|                         |                 | 25 ng/ml    | 6                        | 7       | 6       |
|                         | ii. <b>P2</b>   | 0.005 ng/ml | 12                       | 6       | 6       |
|                         |                 | 0.5 ng/ml   | 12                       | 5       | 6       |
|                         |                 | 5 ng/ml     | 12                       | 7       | 6       |
|                         |                 | 25 ng/ml    | 7                        | 8       | 5       |
|                         | iii. αCD3       | 0.005 ng/ml | 7                        | 5       | 4       |
|                         |                 | 0.5 ng/ml   | 6                        | 3       | 6       |
|                         |                 | 5 ng/ml     | 5                        | 8       | 5       |
|                         |                 | 25 ng/ml    | 7                        | 7       | 6       |
| 2. αCD3 density         | i. <b>P3a</b>   | 0.005 ng/ml | 4                        | 4       | 4       |
|                         |                 | 0.5 ng/ml   | 2                        | 4       | 6       |
|                         |                 | 5 ng/ml     | 4                        | 4       | 4       |
|                         |                 | 25 ng/ml    | 12                       | 6       | 5       |
|                         | ii. <b>P3b</b>  | 0.005 ng/ml | 6                        | 6       | 5       |
|                         |                 | 0.5 ng/ml   | 5                        | 5       | 8       |
|                         |                 | 5 ng/ml     | 8                        | 5       | 7       |
|                         |                 | 25 ng/ml    | 6                        | 5       | 6       |
|                         | iii. <b>P3c</b> | 0.005 ng/ml | 6                        | 6       | 6       |
|                         |                 | 0.5 ng/ml   | 10                       | 10      | 6       |
|                         |                 | 5 ng/ml     | 8                        | 8       | 5       |
|                         |                 | 25 ng/ml    | 14                       | 10      | 5       |
|                         | iv. αCD3        | 0.005 ng/ml | 6                        | 5       | 4       |
|                         |                 | 0.5 ng/ml   | 7                        | 4       | 6       |
|                         |                 | 5 ng/ml     | 5                        | 8       | 5       |
|                         |                 | 25 ng/ml    | 7                        | 7       | 6       |
| 3. dose-response curves | i. <b>P3c</b>   | 0.001 ng/ml | 44                       | 31      | 33      |
|                         |                 | 0.01 ng/ml  | 17                       | 39      | 19      |
|                         |                 | 0.1 ng/ml   | 22                       | 21      | 22      |
|                         |                 | 5 ng/ml     | 22                       | 17      | 18      |
|                         |                 | 10 ng/ml    | 23                       | 14      | 22      |
|                         |                 | 25 ng/ml    | 13                       | 12      | 25      |
|                         |                 | 50 ng/ml    | 14                       | 24      | 24      |
|                         |                 | 100 ng/ml   | 21                       | 26      | 31      |
|                         | ii. αCD3        | 0.001 ng/ml | 10                       | 30      | 23      |
|                         |                 | 0.01 ng/ml  | 24                       | 26      | 26      |
|                         |                 | 0.1 ng/ml   | 14                       | 33      | 33      |
|                         |                 | 5 ng/ml     | 17                       | 16      | 15      |
|                         |                 | 10 ng/ml    | 13                       | 42      | 26      |
|                         |                 | 25 ng/ml    | 8                        | 21      | 15      |
| 50 ng/ml                | 12              | 20          | 31                       |         |         |
| 100 ng/ml               | 11              | 25          | 21                       |         |         |

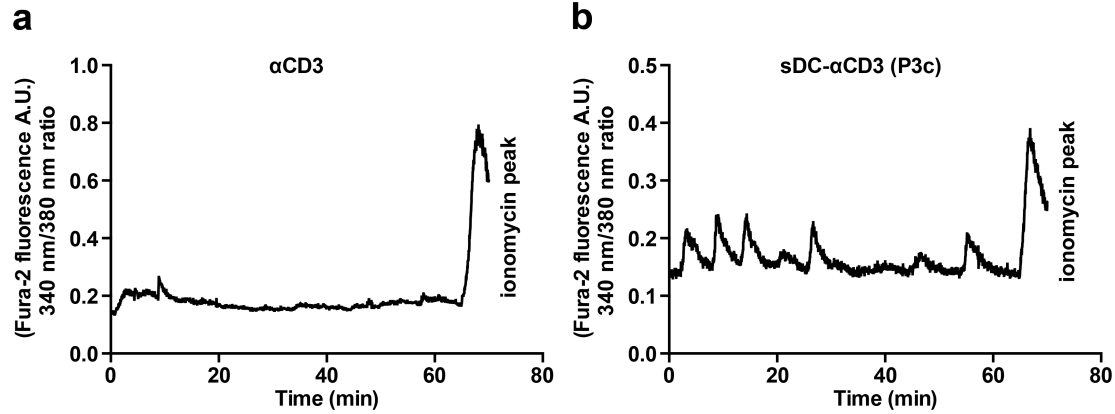

**Figure S4.** Single-cell  $\text{Ca}^{2+}$ -signaling experiments. Representative time traces (340 nm/380 nm ratio) for PBLs treated with free  $\alpha$ CD3 (a) or **P3c** (b).

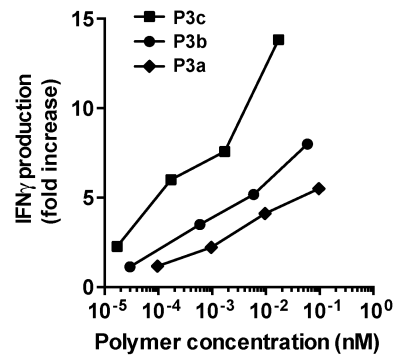

**Figure S5.** IFN $\gamma$  secretion of PBLs treated with **P3a**, **P3b** or **P3c** normalized to polymer concentration.

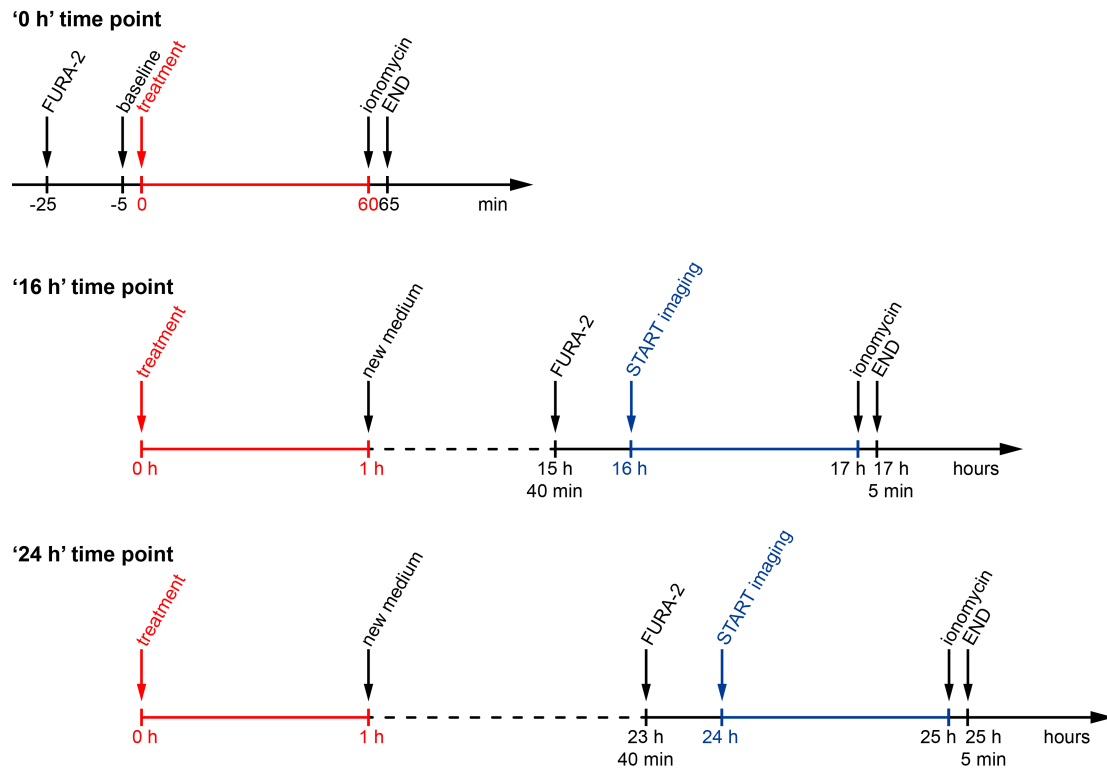

**Figure S6.** Timeline of the post-stimulation single-cell  $\text{Ca}^{2+}$ -signaling experiments. To obtain the '0 h' time point, the Fura-2 loaded cells were treated with the stimulant directly under the microscope and imaged for 1 h. For the '16 h' and '24 h' time points the cells were first treated with the respective stimulant for 1 h, washed to remove the stimulant and then incubated without stimulant for 15 h or 23 h, respectively. During the last 20 min of this incubation period, the cells were loaded with Fura-2. Imaging was started at the indicated time point. At the end of the 1 h imaging period, the cells were treated with ionomycin to determine cell viability. In this post-stimulation experiment, the '5 min' baseline was only determined for the '0 h' time point.



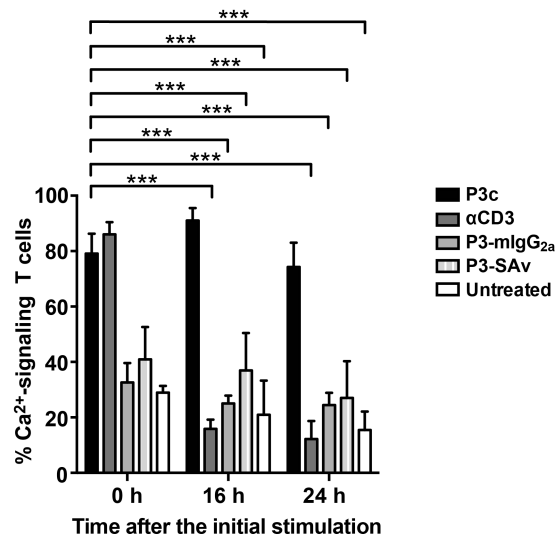

**Figure S7.** Results of the post-stimulation single-cell  $\text{Ca}^{2+}$ -signaling experiments. PBLs were treated with 12.5 ng/ml **P3c** or free  $\alpha$ CD3 for 1 h. The stimulant was removed and the cells were incubated in fresh medium.  $\text{Ca}^{2+}$ -imaging was performed 16 h or 24 h after starting the treatment (15 h or 23 h after removal of the stimulant). As a reference, PBLs were also imaged under the microscope while the stimulant was added (0 h). The graph further shows data obtained for PBLs treated with the following controls: **P3-SAv**, **P3-mIgG<sub>2a</sub>** (isotype control) or medium (untreated). For all experiments the data represents the mean  $\pm$  SEM of 3 independent experiments performed with PBLs from different donors. The number of cells analyzed is summarized in Table S5. The asterisks represent the statistical significance at ‘p’ values of 0.001 (\*\*\*). A clear difference is observed between the post-stimulation signaling of  $\alpha$ CD3-sDC treated cells and the cells treated with the free  $\alpha$ CD3 antibody or any of the controls. Of note, the untreated control shows a small fraction of PBLs (~30 %) that display spontaneous increases in the cytosolic  $\text{Ca}^{2+}$ -concentration (white bars). A similar percentage of PBLs (~26%) showing spontaneous  $\text{Ca}^{2+}$  oscillations ( $\text{Ca}^{2+}$  oscillations that occur in the absence of added stimulant) has been reported before (Donnadieu, E; Bismuth, G; Trautmann, A. The intracellular  $\text{Ca}^{2+}$  concentration optimal for T cell activation is quite different after ionomycin or CD3 stimulation. *Pfluegers Arch. – Eur. J. Physiol.* **1995**, 429 (4), 546-554).

**Table S5.** Number of cells analyzed for the post-stimulation Ca<sup>2+</sup>-signaling experiments.

| Stimulant                  | Incubation time | Number of cells analyzed |         |         |
|----------------------------|-----------------|--------------------------|---------|---------|
|                            |                 | Donor 1                  | Donor 2 | Donor 3 |
| i. P3c                     | 0 h             | 15                       | 14      | 11      |
|                            | 16 h            | 7                        | 8       | 6       |
|                            | 24 h            | 10                       | 7       | 7       |
| ii. αCD3                   | 0 h             | 14                       | 9       | 8       |
|                            | 16 h            | 9                        | 9       | 7       |
|                            | 24 h            | 10                       | 9       | 7       |
| iii. P3-mIgG <sub>2a</sub> | 0 h             | 10                       | 9       | 6       |
|                            | 16 h            | 10                       | 8       | 6       |
|                            | 24 h            | 10                       | 9       | 5       |
| iv. P3-SAv                 | 0 h             | 10                       | 14      | 7       |
|                            | 16 h            | 11                       | 11      | 5       |
|                            | 24 h            | 9                        | 9       | 6       |
| v. untreated               | 0 h             | 9                        | 7       | 8       |
|                            | 16 h            | 9                        | 7       | 5       |
|                            | 24 h            | 9                        | 9       | 7       |

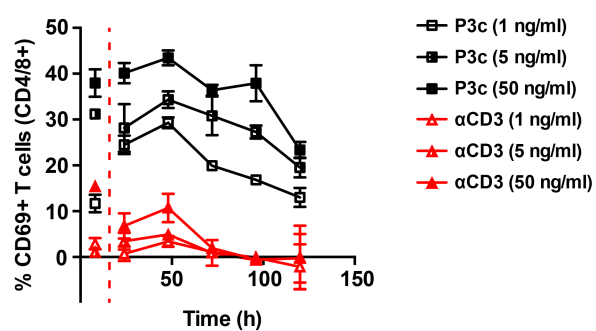

**Figure S8.** Post-stimulation analysis of CD69 expression. Percentage of CD69 expressing T cells after treatment with different concentrations of **P3c** or αCD3.

### Untreated

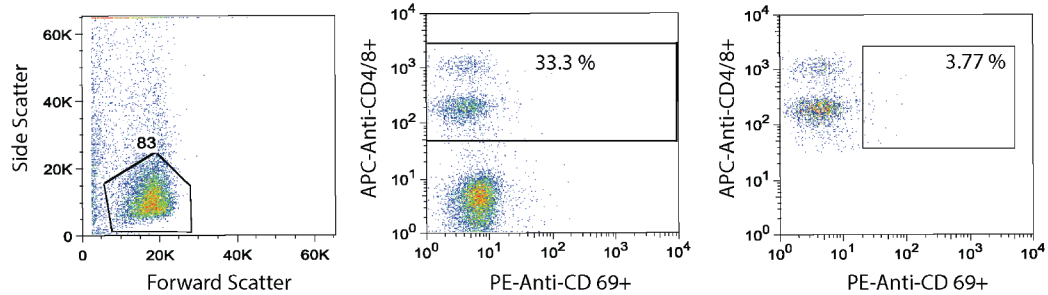

### sDC treated

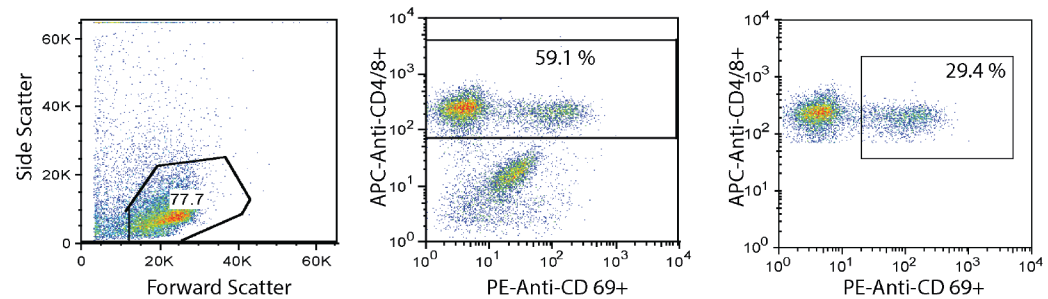

**Figure S9.** FACS analysis of sDC-treated (**P3c**) and untreated PBLs. After identification of CD4/8+ T cells, the percentage of CD69+ cells was determined.
